# Supplementary material for: Investigation of MicroRNA Biomarkers in Equine Distal Interphalangeal Joint Osteoarthritis
Source: MDPI journal article supplement (doi:10.3390/ijms232415526), 2022-12-08
Supplement: s1 [file s1]

## Supplementary data

Table S1. Primers for quantitative real-time polymerase chain reaction (RT-qPCR). Protein coding primers were exon spanning.

| Gene         | Primer sequence 5'-3'                                         |
|--------------|---------------------------------------------------------------|
| eca-miR-16   | UAGCAGCACGUAAAUAUUGGCG                                        |
| eca-miR-92a  | UAUUGCACUUGUCCCGGCCUGU                                        |
| eca-miR-27b  | UUCACAGUGGCUAAGUUCUGC                                         |
| U6 snRNA     | GeneGlobe ID YP02119464                                       |
| eca-ACAN     | F- CAACAACAATGCCCAAGACTAC<br>R- AGTTCTCAAATTGCAAGGAGTG        |
| eca-ADAMTS-4 | F-GCCTTTGGGGAGACGCTGCTACTA<br>R- GATGTGAGCCCCAGGTCCCCCAGC     |
| eca-ADAMTS-5 | F-AACTGGGGGTCTGGGGGTCTGG<br>R-CATTTCTTGCTCACACTGCTCAT         |
| eca-COL1A2   | F-GCACATGCCGTGACTTGAGA<br>R-CATCCATAGTGCATCCTTGATTAGG         |
| eca-COL2A1   | F-TCAAGTCCCTCAACAACCAGATC<br>R-GTCAATCCAGTAGTCTCCGCTCTT       |
| eca-COL3A1   | F-ACGCAAGGCCGTGAGACTA<br>R-TGATCAGGACCACCAACATCA              |
| eca-COMP     | F- GGTGCGGCTGCTATGGAA<br>R- CCAGCTCAGGGCCCTCAT                |
| eca-GAPDH    | F-GCATCGTGGAGGGACTCA<br>R-GCCACATCTTCCCAGAGG                  |
| eca-MMP-13   | F-GTCCCTGATGTGGGTGAATAC<br>R-ACATCAGACCAAACCTTTGAAGG          |
| eca-RUNX2    | F-CTGGGCCATGTGTATGATTTGT<br>R- TTTTGACCTGATATAGAGTGCATGGT     |
| eca-SOX9     | F- CTTTGTTTTGTGTTCGTGTTTTGT<br>R-AGAGAAAGAAAAAGGGAAAGGTAAGTTT |

Table S2 (excel file attached)

Data from the small RNA-sequencing showing all miRNAs detected in the equine synovial fluid samples.

Table S3. miRNAs significantly differentially expressed (FDR < 0.1) between mild and severe OA synovial fluid samples.

| miRNA gene name | LogFC | P value | FDR    | Mean RPM mild OA synovial fluid samples | Mean RPM severe OA synovial fluid samples |
|-----------------|-------|---------|--------|-----------------------------------------|-------------------------------------------|
| eca-miR-92a     | -0.92 | 0.0052  | 0.0470 | 37744                                   | 28479                                     |
| eca-miR-16      | -0.92 | 0.0061  | 0.0470 | 27879                                   | 24882                                     |
| eca-miR-25      | -1.11 | 0.0052  | 0.0470 | 33356                                   | 28754                                     |

*MicroRNA (miRNA), equine callabulus (eca), Log fold change, (LogFC), false discovery rate (FDR), reads per million (RPM) and osteoarthritis (OA).*

Table S4. Results from Normfinder showing the stability value, standard error and mean RPM of miR-27b in the synovial fluid samples.

| <b>miRNA gene name</b> | <b>Stability value</b> | <b>Standard error</b> | <b>Mean RPM in synovial fluid samples</b> |
|------------------------|------------------------|-----------------------|-------------------------------------------|
| eca-miR-27b            | 0.346                  | 0.051                 | 10046                                     |

Table S5. Number of synovial fluid samples needed in the mild OA and severe OA group to obtain a power of 0.95 at a significance level of 0.05 for each miRNA.

| <b>miRNA</b> | <b>Number of samples needed for each group</b> |
|--------------|------------------------------------------------|
| miR-92a      | 36                                             |
| miR-16       | 417                                            |
| miR-25       | 2149                                           |
